# Supplementary material for: Synthesis of 2′-O-monohaloethoxymethyl-modified RNAs and their duplex formation ability
Source: Royal Society of Chemistry journal article supplement (doi:10.1039/c7ra07767j), 2017-01-01
Supplement: c7ra07767j1.pdf [file c7ra07767j1.pdf]

Supporting Information for

**Synthesis of 2'-O-monohaloethoxymethyl-modified RNAs and their duplex formation ability**

Rintaro Iwata Hara,<sup>a</sup> Masayuki Kageyama,<sup>b</sup> Koichiro Arai,<sup>b</sup> Naoki Uchiyama,<sup>b</sup> and <sup>b</sup> Takeshi Wada<sup>a</sup>

<sup>a</sup>*Faculty of Pharmaceutical Sciences, Tokyo University of Science, 2641 Yamazaki, Noda, Chiba 278-8510, Japan.* <sup>b</sup>*Graduate School of Frontier Sciences, the University of Tokyo, 5-1-5 Kashiwanoha, Kashiwa, Chiba 277-8562, Japan.*

Table of contents

|                        |    |
|------------------------|----|
| UV melting curves      | 2  |
| Synthesis of compounds | 4  |
| NMR spectra            | 12 |

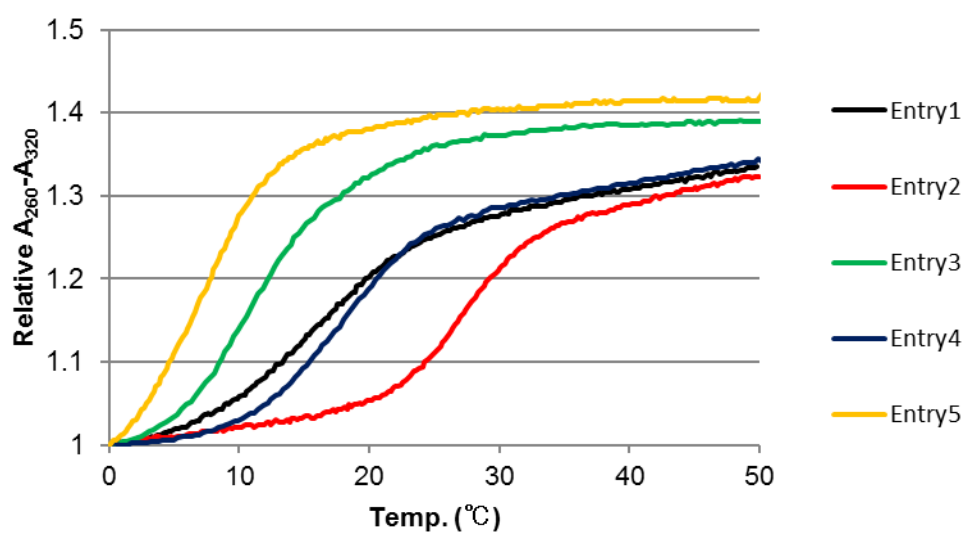

Fig. S1 UV melting curves of rU<sub>12</sub>/rA<sub>12</sub>, 2'-O-modified rU<sub>12</sub>/rA<sub>12</sub>, and rU<sub>12</sub>/2'-O-modified rA<sub>12</sub> (Corresponding to Entries 1–5 in Table 1)

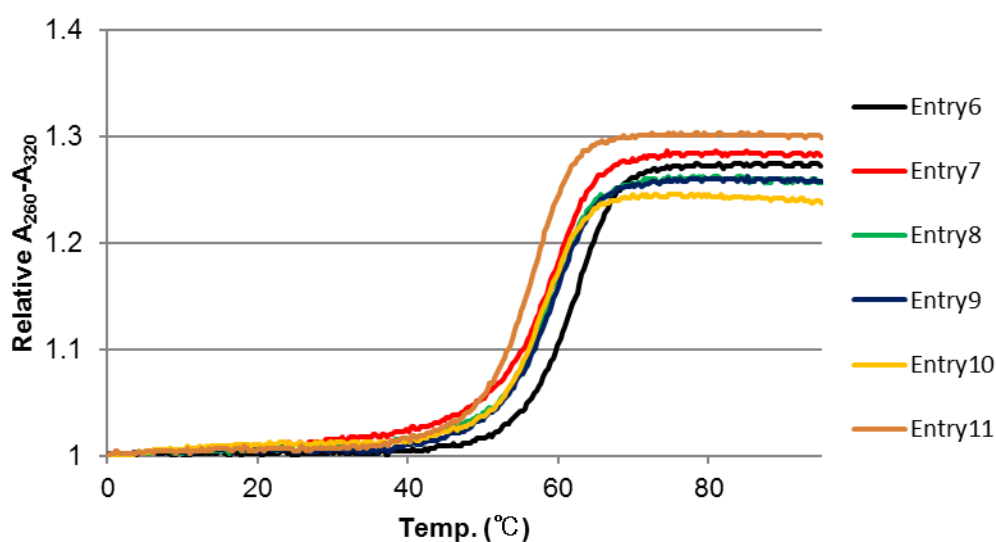

Fig. S2 UV melting curves of r(GUCA)<sub>3</sub>/r(UGAC)<sub>3</sub> and 2'-O-MCEM-modified r(GUCA)<sub>3</sub>/r(UGAC)<sub>3</sub> (Corresponding to Entries 6–11 in Table 1)

Table S1 melting temperature of rU<sub>12</sub>/rA<sub>12</sub>, 2'-*O*-EOM rU<sub>12</sub>/rA<sub>12</sub>, and 2'-*O*-MCEM rU<sub>12</sub>/rA<sub>12</sub> of various concentrations.

| C <sub>tot</sub> /μM | unmodified | EOM  | MCEM |
|----------------------|------------|------|------|
| 16                   | -          | 16.8 | 30.1 |
| 11                   | 19.6       | 15.9 | 29.2 |
| 8.0                  | 18.0       | 15.1 | 28.4 |
| 5.7                  | 17.4       | 14.4 | 27.5 |
| 4.0                  | 16.4       | 13.6 | 26.8 |
| 2.8                  | 15.1       | 12.9 | 26.3 |
| 2.0                  | -          | 12.1 | 25.8 |
| 1.4                  | 12.7       | -    |      |

## Compound 2

Compound **1** (1.65 g, 3.0 mmol) was dried with repeated coevaporation with pyridine and toluene, and dissolved in THF (11 mL). 2-Fluoroethanol (1.65 mL, 30 mmol) was added and the mixture was cooled to -40 °C. *N*-Iodosuccinimide (0.81 g, 3.6 mmol, in 8.1 mL of THF) was added, followed by trifluoromethanesulfonic acid (528  $\mu$ L, 6.0 mmol in 7.3 mL of THF) added dropwise to the mixture. After 1 h, the reaction was quenched with triethylamine (7 mL). The resulting solution was diluted with dichloromethane (100 mL), and washed with 10% solution of Na<sub>2</sub>S<sub>2</sub>O<sub>3</sub> (80 mL  $\times$  3) and a saturated aqueous solution of NaHCO<sub>3</sub> (80 mL  $\times$  3). The water layers were combined and extracted with dichloromethane (50 mL  $\times$  3). The combined organic layer was dried over Na<sub>2</sub>SO<sub>4</sub>, filtered, and concentrated. The crude product was purified with silica gel column chromatography [hexane–ethyl acetate (2:1, v/v)] to afford **2** (1.49 g, 2.64 mmol, 88%).

<sup>1</sup>H NMR (300 MHz, CDCl<sub>3</sub>)  $\delta$  9.57 (1H, br), 7.90 (1H,  $J$  = 8.1 Hz), 5.76 (1H, s), 5.69 (1H, d,  $J$  = 8.1), 5.05-4.99 (2H, m), 4.68-4.53 (2H, m), 4.29-3.86 (7H, m), 1.10-0.91 (28H, m)

## Compound 3

Compound **2** (1.12 g, 2.0 mmol) was dried with repeated coevaporation with pyridine and toluene, and dissolved in methanol (9.5 mL). Ammonium fluoride (291 mg, 8 mmol) was added, and the solution was heated to 50 °C. After 19 h, the reaction was quenched with methoxytrimethylsilane (1 mL), and the mixture was concentrated. Acetonitrile (100 mL) was added and insoluble solid was removed by filtration. The residue was washed with hexane (60 mL  $\times$  3) and the resulting solution was extracted with acetonitrile (50 mL  $\times$  2). All acetonitrile solutions were combined and concentrated. The mixture was dried with repeated coevaporation with pyridine, and dissolved in pyridine (20 mL). 4,4'-dimethoxytritylchloride (714 mg, 2.1 mmol) was added and the solution was stirred for 20 h. The reaction was quenched with methanol (1 mL). The solution was diluted with chloroform (150 mL) and then washed with a saturated aqueous solution of NaHCO<sub>3</sub> (100 mL  $\times$  3). The water layers were combined and extracted with chloroform (80 mL  $\times$  3). The combined organic layer was dried over Na<sub>2</sub>SO<sub>4</sub>, filtered, and concentrated. The crude product was purified with silica gel column chromatography [dichloromethane–methanol–pyridine (99.5:0:0.5 to 98.5:1:0.5, v/v/v)] to afford **3** (908 mg, 1.46 mmol, 73%).

<sup>1</sup>H NMR (300 MHz, CDCl<sub>3</sub>)  $\delta$  8.03 (1H, br), 7.93 (1H, d,  $J$  = 8.4 Hz), 7.39-7.16 (9H, m), 6.87-6.82 (4H, m), 6.02 (1H, d,  $J$  = 3.3 Hz), 5.29 (1H, dd,  $J$  = 8.1, 2.4 Hz), 5.04 (1H, d,  $J$  = 6.6 Hz), 4.93 (1H, d,  $J$  = 6.6 Hz), 4.67-4.64 (1H, m), 4.52-4.46 (2H, m), 4.36-4.34 (1H, m), 4.10-4.08 (1H, m), 3.94-3.80 (8H, m), 3.53-3.52 (2H, m), 2.61 (1H, d,  $J$  = 6.9 Hz).

#### Compound 4

Compound **3** (908 mg, 1.46 mmol) was dried with repeated coevaporation with pyridine and toluene, and dissolved in dichloromethane (8.0 mL). To the solution, *N,N*-diisopropylethylamine (744  $\mu$ L, 4.4 mmol) was added followed by 2-cyanoethyl *N,N*-diisopropylchlorophosphoramidite (325  $\mu$ L, 2.92 mmol, in 7 mL of dichloromethane) added dropwise. After 1.5 h, the reaction was quenched with ethanol (2 mL). The solution was diluted with dichloromethane (80 mL), and washed with a saturated aqueous solution of NaHCO<sub>3</sub> (80 mL  $\times$  3). The water layers were combined and extracted with chloroform (80 mL  $\times$  3). The combined organic layer was dried over Na<sub>2</sub>SO<sub>4</sub>, filtered, and concentrated. The crude product was purified with silica gel column chromatography [hexane-ethyl acetate (7:3 to 0:10, v/v)] to afford **4** (918 mg, 1.12 mmol, 77%).

<sup>1</sup>H NMR (300 MHz, CDCl<sub>3</sub>)  $\delta$  8.80-8.20 (1H, br), 7.95-7.90 (1H, m), 7.41-6.84 (13H, m), 6.06 (1H, d,  $J$  = 3.6 Hz), 5.26 (1H, dd,  $J$  = 12.6, 7.8 Hz), 5.01-4.86 (2H, m), 4.67-4.43 (4H, m), 4.28-4.20 (1H, m), 3.97-3.40 (14H, m), 2.68-2.41 (2H, m), 1.28-1.03 (12H, m).

<sup>31</sup>P NMR (121 MHz, CDCl<sub>3</sub>)  $\delta$  151.1, 150.8.

MALDI-TOF MS: calcd for C<sub>42</sub>H<sub>52</sub>FKN<sub>4</sub>O<sub>10</sub>P  $m/z$  [M + K]<sup>+</sup> 861.30 Found 861.49.

#### Compound 6

Compound **5** (1.83 g, 3.0 mmol) was dried with repeated coevaporation with pyridine and toluene, and then dissolved in THF (11 mL). 2-Fluoroethanol (825  $\mu$ L, 15 mmol) was added and the mixture cooled to -40 °C. *N*-Iodosuccinimide (0.81 g, 3.6 mmol, in 8.1 mL of THF) was added, and then trifluoromethanesulfonic acid (351  $\mu$ L in 7 mL of THF) added in a dropwise manner. After 1 h, the reaction was quenched with triethylamine (7 mL). The resulting solution was diluted with dichloromethane (100 mL), and washed with 10% solution of Na<sub>2</sub>S<sub>2</sub>O<sub>3</sub> (100 mL  $\times$  2) and a saturated aqueous solution of NaHCO<sub>3</sub> (100 mL  $\times$  3). The water layers were combined and extracted with dichloromethane (50 mL  $\times$  3). The combined organic layer was dried over Na<sub>2</sub>SO<sub>4</sub>, filtered, and concentrated. The crude product was purified with silica gel column chromatography [hexane-ethyl acetate (2:1, v/v)] to afford **6** (1.19 g, 1.90 mmol, 63%).

<sup>1</sup>H NMR (300 MHz, CDCl<sub>3</sub>)  $\delta$  8.63 (2H, s), 8.30 (1H, s), 6.10 (1H, s), 5.05 (2H, s), 4.78-4.73 (1H, m), 4.68-4.66 (1H, m), 4.55-4.50 (2H, m), 4.26 (1H, d,  $J$  = 13.5 Hz), 4.17 (1H, d,  $J$  = 9.3 Hz), 4.06-3.80 (3H, m), 2.62 (3H, s), 1.11-0.99 (28H, m).

#### Compound 7

Compound **6** (0.885 g, 1.41 mmol) was dissolved in THF (15 mL) and triethylammonium trifluoride (345  $\mu$ L, 2.1 mmol) was added. The solution was stirred at 50 °C for 6 h and the reaction was quenched with methoxytrimethylsilane (0.3 mL), and the mixture was then

concentrated. Acetonitrile was added and the insoluble solid was removed by filtration. The residue was washed with hexane and the resulting solution extracted with acetonitrile. All the acetonitrile solutions were combined and concentrated. The mixture was dissolved in THF (6 mL), and the solution was added to hexane (300 mL) in a dropwise manner. The solid obtained by reprecipitation was dried with repeated coevaporation with pyridine, and dissolved in pyridine (11 mL). 4,4'-Dimethoxytritylchloride (434 mg, 1.1 mmol) was added and the solution stirred for 16 h. The reaction was quenched with methanol (1 mL). The solution was diluted with chloroform (150 mL) and washed with a saturated aqueous solution of NaHCO<sub>3</sub> (100 mL × 3). The water layers were combined and extracted with chloroform (80 mL × 3). The combined organic layer was dried over Na<sub>2</sub>SO<sub>4</sub>, filtered, and concentrated. The crude product was purified with silica gel column chromatography [dichloromethane–methanol–pyridine (99.5:0:0.5 to 97.5:2:0.5, v/v/v)] to afford **7** (758 mg, 1.08 mmol, 76%).

<sup>1</sup>H NMR (300 MHz, CDCl<sub>3</sub>) δ 8.60 (1H, s), 8.37 (1H, s), 8.15 (1H, s), 7.44-7.11 (9H, m), 6.80 (4H, d, *J* = 8.7 Hz), 6.23 (1H, d, *J* = 4.8 Hz), 4.97 (1H, t, *J* = 5.1 Hz), 4.88 (2H, s), 4.59-4.54 (2H, m), 4.40-4.39 (1H, m), 4.29-4.25 (1H, m), 3.81-3.68 (8H, m), 3.53-3.41 (4H), 2.69-2.67 (1H, m), 2.63 (3H, s).

#### Compound **8**

Compound **7** (726 mg, 1.03 mmol) was dried with repeated coevaporation with pyridine and toluene, and dissolved in dichloromethane (8.0 mL). To the solution, *N,N*-diisopropylethylamine (600 μL, 3.5 mmol) was added, followed by 2-cyanoethyl *N,N*-diisopropylchlorophosphoramidite (390 μL, 1.75 mmol, in 3.6 mL of dichloromethane) added in a dropwise manner. After 3 h, the reaction was quenched with ethanol (2 mL). The solution was diluted with dichloromethane (80 mL), and washed with a saturated aqueous solution of NaHCO<sub>3</sub> (80 mL × 3). The water layers were combined and extracted with dichloromethane (50 mL × 3). The combined organic layer was dried over Na<sub>2</sub>SO<sub>4</sub>, filtered, and concentrated. The crude product was purified with silica gel column chromatography [dichloromethane–methanol–pyridine (99.5:0:0.5 to 98:1.5:0.5, v/v/v)], and then with reprecipitation (5 mL dichloromethane/ 300 mL ice cold hexane) to afford **8** (342 mg, 378 μmol, 37%).

<sup>1</sup>H NMR (300 MHz, CDCl<sub>3</sub>) δ 8.60 (1H, s), 8.49 (1H, s), 8.18 (1H, s), 7.42-7.18 (9H, s), 6.82-6.75 (4H, m), 6.24-6.19 (1H, m), 5.12 (1H, t, *J* = 5.4 Hz), 4.92-4.69 (3H, m), 4.48-4.31 (3H, m), 3.95-3.34 (14H, m), 2.67-2.34 (5H, m), 1.20-1.06 (12H, m)

<sup>31</sup>P NMR (121 MHz, CDCl<sub>3</sub>) δ 151.8, 151.3.

MALDI-TOF MS: calcd for C<sub>45</sub>H<sub>55</sub>FKN<sub>7</sub>O<sub>9</sub>P *m/z* [M + K]<sup>+</sup>: 926.34 Found 926.55.

#### Compound **9**

Compound **5** (3.68 g, 6.0 mmol) was dried with repeated coevaporation with pyridine and

toluene, and then dissolved in THF (20 mL). 2-Chloroethanol (4.04 mL, 60 mmol) was added and the mixture was cooled to  $-40\text{ }^{\circ}\text{C}$ . *N*-Iodosuccinimide (1.62 g, 7.2 mmol, in 16.2 mL of THF) was added and trifluoromethanesulfonic acid (1.05 mL in 21 mL of THF) was added dropwise to the mixture. After 5.5 h, the reaction was quenched with triethylamine (10 mL). The resulting solution was diluted with chloroform (300 mL), and washed with 10% solution of  $\text{Na}_2\text{S}_2\text{O}_3$  (150 mL  $\times$  2) and a saturated aqueous solution of  $\text{NaHCO}_3$  (120 mL  $\times$  3). The water layers were combined and extracted with chloroform (100 mL  $\times$  3). The combined organic layer was dried over  $\text{Na}_2\text{SO}_4$ , filtered, and concentrated. The crude product was purified with silica gel column chromatography [hexane-ethyl acetate (2:1, v/v), and dichloromethane-methanol (99:1, v/v)] to afford **9** (1.53 g, 2.38 mmol, 40%).

$^1\text{H}$  NMR (300 MHz,  $\text{CDCl}_3$ )  $\delta$  8.65 (2H, m), 8.31 (1H, s), 6.10 (1H, s), 5.08-5.02 (2H, m), 4.74-4.70 (1H, m), 4.54-4.53 (1H, m), 4.55-4.50 (2H, m), 4.26 (1H, d,  $J = 13.2$  Hz), 4.17 (1H, m), 4.08-4.01 (2H, m), 3.93-3.85 (1H, m), 2.62 (3H, s), 1.11-0.97 (28H, m).

#### Compound **10**

Compound **9** (1.53 g, 2.38 mmol) was dissolved in THF (25 mL) and triethylammonium trifluoride (715  $\mu\text{L}$ , 4.4 mmol) was added. The solution was stirred at  $50\text{ }^{\circ}\text{C}$  for 6 h and the reaction was quenched with methoxytrimethylsilane (1 mL), followed by concentration of the mixture. The mixture was dissolved in THF (5 mL), and the solution was added to hexane (400 mL) in a dropwise manner. The solid obtained by the reprecipitation was dried with repeated coevaporation with pyridine, and dissolved in pyridine (20 mL). 4,4'-Dimethoxytritylchloride (850 mg, 2.50 mmol) was added. After 2 h, another 4,4'-dimethoxytritylchloride (120 mg) was added again and the solution was stirred for 12 h. The reaction was quenched with methanol (3 mL). The solution was diluted with chloroform (200 mL) and washed with a saturated aqueous solution of  $\text{NaHCO}_3$  (140 mL  $\times$  3). The water layers were combined and extracted with chloroform (50 mL  $\times$  3). The combined organic layer was dried over  $\text{Na}_2\text{SO}_4$ , filtered, and concentrated. The crude product was purified with silica gel column chromatography [dichloromethane-methanol-pyridine (99.5:0:0.5 to 98.5:1:0.5, v/v/v)] to afford **10** (1.68 g, 2.38 mmol, quant).

$^1\text{H}$  NMR (300 MHz,  $\text{CDCl}_3$ )  $\delta$  8.61 (1H, s), 8.56 (1H, s), 8.17 (1H, s), 7.43-7.22 (9H, m), 6.84-6.79 (4H, m), 6.24 (1H, d,  $J = 5.1$  Hz), 4.97 (1H, t,  $J = 5.1$  Hz), 4.88 (2H, s), 4.59-4.57 (1H, m), 4.28-4.27 (1H, m), 3.80-3.43 (12H, m), 2.70 (1H, d,  $J = 4.8$  Hz), 2.62 (3H, s).

#### Compound **11**

Compound **10** (1.68 g, 2.38 mmol) was dried with repeated coevaporation with pyridine and toluene, and dissolved in dichloromethane (15 mL). To the solution, *N,N*-diisopropylethylamine (1.4 mL, 8.2 mmol) was added, followed by 2-cyanoethyl *N,N*-

diisopropylchlorophosphoramidite (802  $\mu$ L, 3.6 mmol, in 9.5 mL of dichloromethane) was added in a dropwise manner. After 5 h, the reaction was quenched with ethanol (1 mL). The solution was diluted with chloroform (150 mL), and washed with a saturated aqueous solution of NaHCO<sub>3</sub> (100 mL  $\times$  3). The water layers were combined and extracted with chloroform (50 mL  $\times$  3). The combined organic layer was dried over Na<sub>2</sub>SO<sub>4</sub>, filtered, and concentrated. The crude product was purified with silica gel column chromatography [dichloromethane–methanol–pyridine (99.5:0:0.5 to 98:1.5:0.5, v/v/v), and ethyl acetate–hexane (3:1, v/v, containing 0.5% of triethylamine)] to afford **11** (1.04 g, 1.15 mmol, 48%).

<sup>1</sup>H NMR (300 MHz, CDCl<sub>3</sub>)  $\delta$  8.60 (1H, s), 8.49 (1H, s), 8.18 (1H, s), 7.43–7.21 (9H, s), 6.82–6.78 (4H, m), 6.24–6.20 (1H, m), 5.10 (1H, t,  $J$  = 6.0 Hz), 4.92–4.62 (3H, m), 4.42–4.33 (1H, m) 3.95–3.35 (16H, m), 2.67–2.37 (5H, m), 1.20–1.06 (12H, m)

<sup>31</sup>P NMR (121 MHz, CDCl<sub>3</sub>)  $\delta$  151.3, 150.9.

MALDI-TOF MS: calcd for C<sub>45</sub>H<sub>55</sub>ClKN<sub>7</sub>O<sub>9</sub>P  $m/z$  [M + K]<sup>+</sup>: 942.31 Found 942.49.

### Compound 13

Compound **12** (3.53 g, 6.0 mmol) was dried with repeated coevaporation with pyridine and toluene, and then dissolved in THF (44 mL). 2-Chloroethanol (2.0 mL, 30 mmol) was added and the mixture was cooled to -40 °C. *N*-Iodosuccinimide (1.62 g, 7.2 mmol) was added, followed by trifluoromethanesulfonic acid (1.05 mL in 21 mL of THF) in a dropwise manner. After 2.5 h, the reaction was quenched with triethylamine (6 mL). The resulting solution was diluted with chloroform (150 mL), and washed with 10% solution of Na<sub>2</sub>S<sub>2</sub>O<sub>3</sub> (100 mL  $\times$  2) and a saturated aqueous solution of NaHCO<sub>3</sub> (100 mL  $\times$  3). The water layers were combined and extracted with chloroform (100 mL  $\times$  3). The combined organic layer was dried over Na<sub>2</sub>SO<sub>4</sub>, filtered, and concentrated. The crude product was purified with silica gel column chromatography [hexane–ethyl acetate (4:1 to 2:1, v/v)] to afford **13** (2.73 g, 4.4 mmol, 73%). <sup>1</sup>H NMR (300 MHz, CDCl<sub>3</sub>)  $\delta$  8.53 (1H, br), 8.30 (1H, d,  $J$  = 7.5 Hz), 7.38 (1H, d,  $J$  = 7.5), 5.80 (1H, s), 5.14 (1H, d,  $J$  = 6.9), 5.01 (1H, d,  $J$  = 6.6), 4.32–4.19 (4H, m), 4.03–3.89 (3H, m), 3.70 (2H, m). 2.23 (3H, s), 1.11–0.94 (28H, m).

### Compound 14

Compound **13** (2.42 g, 3.9 mmol) was dissolved in THF (10 mL) and triethylammonium trifluoride (956  $\mu$ L, 5.9 mmol) was added. The solution was stirred at 50 °C for 23 h and the reaction was quenched with methoxytrimethylsilane (1 mL), followed by concentration of the mixture. The mixture was washed with hexane and acetonitrile. The insoluble solid was dried with repeated coevaporation with pyridine, and dissolved in pyridine (30 mL). 4,4'-dimethoxytritylchloride (1.2 g, 3.5 mmol) was added. After 21 h, the reaction was quenched with methanol (6 mL). The solution was diluted with chloroform (100 mL) and washed with a



saturated aqueous solution of NaHCO<sub>3</sub> (150 mL × 3). The water layers were combined and extracted with chloroform (50 mL × 2). The combined organic layer was dried over Na<sub>2</sub>SO<sub>4</sub>, filtered, and concentrated. The crude product was purified with silica gel column chromatography [dichloromethane–methanol–pyridine (99.5:0:0.5 to 98.5:1:0.5, v/v/v)] to afford **14** (1.91 g, 2.80 mmol, 73%).

<sup>1</sup>H NMR (300 MHz, CDCl<sub>3</sub>) δ 8.47 (1H, d, *J* = 7.5 Hz), 8.18 (1H, br), 7.43-7.16 (9H, m), 7.06 (1H, d, *J* = 7.2 Hz), 6.89-6.85 (4H, m), 6.00 (1H, s), 5.22 (1H, d, *J* = 6.6 Hz), 5.01 (1H, d, *J* = 6.6 Hz), 4.50-4.40 (1H, m), 4.29-4.27 (1H, m), 4.09 (1H, d, *J* = 8.7 Hz), 3.93-3.88 (2H, m), 3.81 (6H, s), 3.66 (2H, t, *J* = 5.7 Hz), 3.60-3.50 (2H, m), 2.55 (1H, d, *J* = 9.0 Hz), 2.21 (3H, s)

### Compound 15

Compound **14** (1.91 g, 2.80 mmol) was dried with repeated coevaporation with pyridine and toluene, and dissolved in dichloromethane (28 mL). To the solution, *N,N*-diisopropylethylamine (1.4 mL, 8.2 mmol) was added, followed by 2-cyanoethyl *N,N*-diisopropylchlorophosphoramidite (940 μL, 4.2 mmol) in a dropwise manner. After 4.5 h, the reaction was quenched with ethanol (1 mL). The solution was diluted with chloroform (120 mL) and washed with a saturated aqueous solution of NaHCO<sub>3</sub> (100 mL × 3). The water layers were combined and extracted with chloroform (50 mL × 2). The combined organic layer was dried over Na<sub>2</sub>SO<sub>4</sub>, filtered, and concentrated. The crude product was purified with silica gel column chromatography [ethyl acetate–hexane (3:7 to 10:0, v/v, containing 0.5% of pyridine)] to afford **15** (1.79 g, 2.03 mmol, 73%).

<sup>1</sup>H NMR (300 MHz, CDCl<sub>3</sub>) δ 8.53-8.44 (1H, m), 8.38-8.24 (1H, m), 7.44-7.26 (9H, m), 6.99-6.84 (5H, m), 6.05 (1H, s), 5.09-4.96 (2H, m), 4.59-4.53 (1H, m), 4.38-4.24 (2H, m), 4.17-3.99 (1H, m), 3.87-3.44 (15H, m), 2.62-2.40 (2H, m), 2.19 (3H, s), 1.17-0.99 (12H, m).

<sup>31</sup>P NMR (121 MHz, CDCl<sub>3</sub>) δ 152.1, 150.7.

MALDI-TOF MS: calcd for C<sub>44</sub>H<sub>55</sub>ClKN<sub>5</sub>O<sub>10</sub>P *m/z* [*M* + *K*]<sup>+</sup>: 918.30 Found 918.48.

### Compound 17

Compound **16** (4.32 g, 6.0 mmol) was dried with repeated coevaporation with pyridine and toluene and dissolved in THF (40 mL). 2-Chloroethanol (4.02 mL, 60 mmol) was added and the mixture was cooled to -40 °C. *N*-Iodosuccinimide (1.62 g, 7.2 mmol) was added, and then trifluoromethanesulfonic acid (1.05 mL in 21 mL of THF) in a dropwise manner to the mixture. After 1 h, the reaction was quenched with triethylamine (5 mL). The resulting solution was diluted with chloroform (300 mL), and washed with 10% solution of Na<sub>2</sub>S<sub>2</sub>O<sub>3</sub> (200 mL × 2) and a saturated aqueous solution of NaHCO<sub>3</sub> (150 mL × 3). The water layers were combined and extracted with chloroform (50 mL × 3). The combined organic layer was dried over Na<sub>2</sub>SO<sub>4</sub>, filtered, and concentrated. The crude product was purified with silica gel column

chromatography [dichloromethane–methanol (100:0 to 99:1, v/v)] to afford **17** (2.91 g, 3.87 mmol, 65%).

<sup>1</sup>H NMR (300 MHz, CDCl<sub>3</sub>) δ 11.81 (1H, br), 9.02 (1H, br), 8.07 (1H, s), 7.41-7.36 (2H, m), 7.11 (1H, t, *J* = 7.2 Hz), 7.01-6.96 (2H, m), 5.96 (1H, s), 5.07-4.99 (2H, d × 2, *J* = 6.6, 6.9 Hz), 4.70 (2H, s), 4.57-4.52 (1H, m), 4.33-3.89 (6H, m), 3.63 (2H, t, *J* = 6.0 Hz), 1.11-0.94 (28H, m).

### Compound **18**

Compound **17** (2.53 g, 3.36 mmol) was dissolved in THF (16.8 mL) and triethylammonium trifluoride (920 μL, 5.65 mmol) was added. The solution was stirred at 50 °C for 5 h, and then the reaction was quenched with methoxytrimethylsilane (1 mL). The mixture was then stirred overnight and concentrated. The mixture was dissolved in THF (16.8 mL), and then the solution was added to hexane (400 mL) in a dropwise manner. The solid obtained with reprecipitation was dried with repeated coevaporation with pyridine, and dissolved in pyridine (30 mL). 4,4'-Dimethoxytritylchloride (1.2 g, 3.5 mmol) was added. After 18 h, the reaction was quenched with methanol (3 mL). The solution was diluted with chloroform (300 mL) and washed with a saturated aqueous solution of NaHCO<sub>3</sub> (150 mL × 3). The water layers were combined and extracted with chloroform (50 mL × 2). The combined organic layer was dried over Na<sub>2</sub>SO<sub>4</sub>, filtered, and concentrated. The crude product was purified with silica gel column chromatography [dichloromethane-methanol-pyridine (99.5:0:0.5 to 98.5:1:0.5, v/v/v)] to afford **18** (0.82 g, 0.84 mmol, 25%).

<sup>1</sup>H NMR (300 MHz, CDCl<sub>3</sub>) δ 7.50-7.43 (3H, m), 7.34-7.11 (18H, m), 6.80-6.71 (8H, m), 5.65 (1H, d, *J* = 4.2 Hz), 4.63-4.50 (3H, m), 4.20 (1H, br), 4.09 (1H, d, *J* = 3.0 Hz), 3.72-3.38 (17 H), 3.28-3.23 (1H, m), 2.69 (1H, br).

### Compound **19**

Compound **18** (727 mg, 741 μmol) was dried with repeated coevaporation with pyridine and toluene, and dissolved in dichloromethane (9 mL). To the solution, *N,N*-diisopropylethylamine (457 μL, 2.69 mmol) was added, followed by 2-cyanoethyl *N,N*-diisopropylchlorophosphoramidite (299 μL, 1.34 mmol) was added in a dropwise manner. After 5 h, the reaction was quenched with ethanol (1 mL). The solution was diluted with chloroform (150 mL), and washed with a saturated aqueous solution of NaHCO<sub>3</sub> (100 mL × 3). The water layers were combined and extracted with chloroform (50 mL × 2). The combined organic layer was dried over Na<sub>2</sub>SO<sub>4</sub>, filtered, and concentrated. The crude product was purified with silica gel column chromatography [ethyl acetate–hexane (5:5 to 8:2, v/v, containing 0.5% of pyridine)], and then reprecipitation (4 mL dichloromethane/ 400 mL hexane, 5 times) to afford

**19** (329 mg, 283  $\mu$ mol, 38%).

$^1\text{H}$  NMR (300 MHz,  $\text{CDCl}_3$ )  $\delta$  7.73-6.91 (20H, m), 6.80-6.70 (8H, m), 6.05-5.98 (1H, m), 5.93-5.80 (1H, m), 5.20-5.10 (1H, m), 4.85-4.78 (1H, m), 4.70-4.64 (1H, m), 4.58-4.50 (1H, m), 4.33-4.24 (1H, m), 3.97-3.40 (21H, m), 3.18-3.10 (1H, m), 2.68-2.26 (2H, m), 1.27-0.99 (12H, m).

$^{31}\text{P}$  NMR (121 MHz,  $\text{CDCl}_3$ )  $\delta$  151.8, 151.3.

MALDI-TOF MS: calcd for  $\text{C}_{64}\text{H}_{71}\text{ClKN}_7\text{O}_{11}\text{P}$   $m/z$   $[\text{M} + \text{K}]^+$ : 1218.43 Found 1218.64.

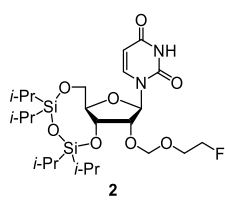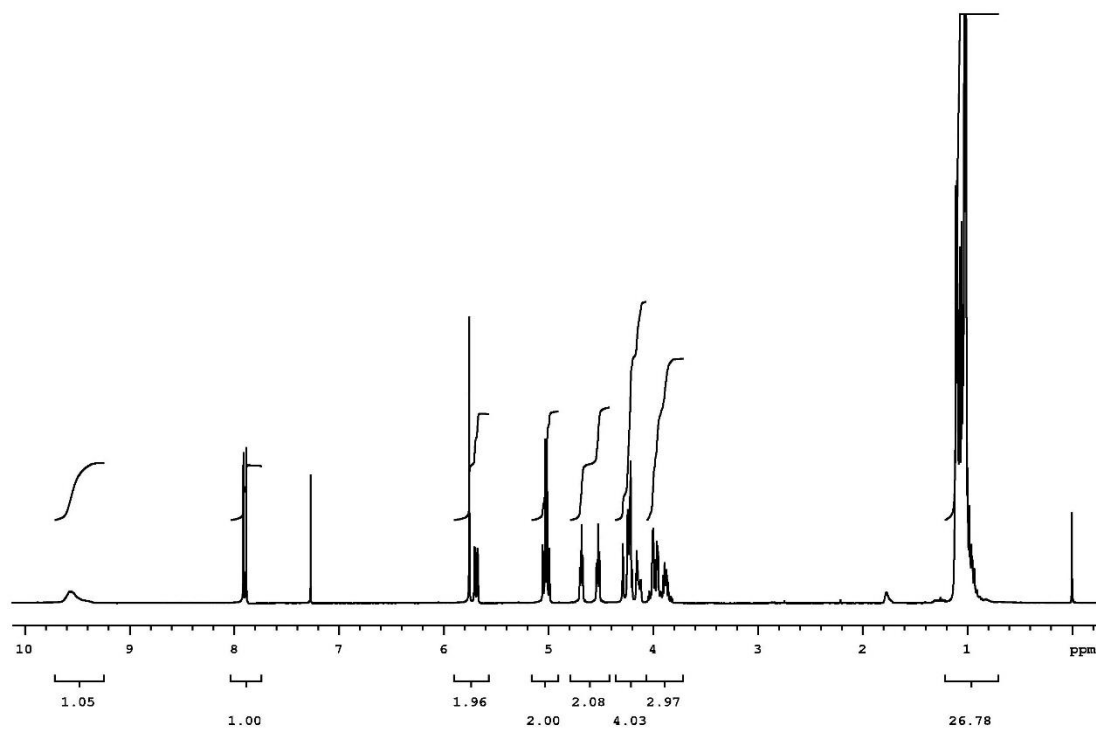

Fig. S3 <sup>1</sup>H-NMR spectra of compound 2 in CDCl<sub>3</sub>.

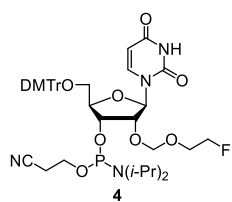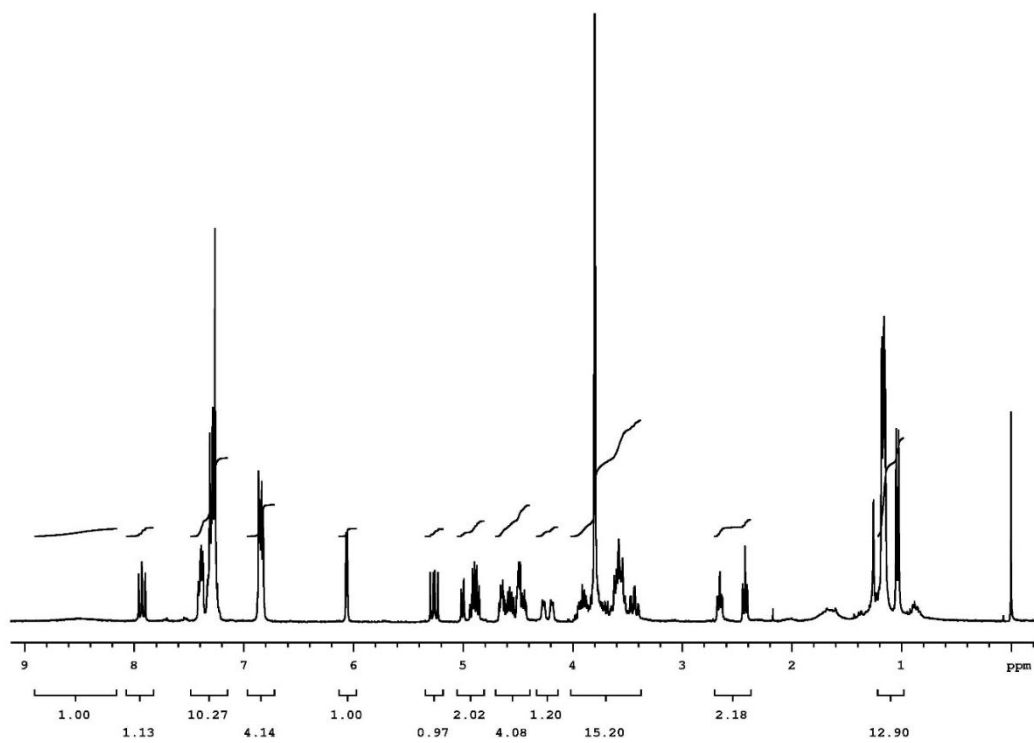

Fig. S4  $^1\text{H}$ -NMR spectra of compound **4** in  $\text{CDCl}_3$ .

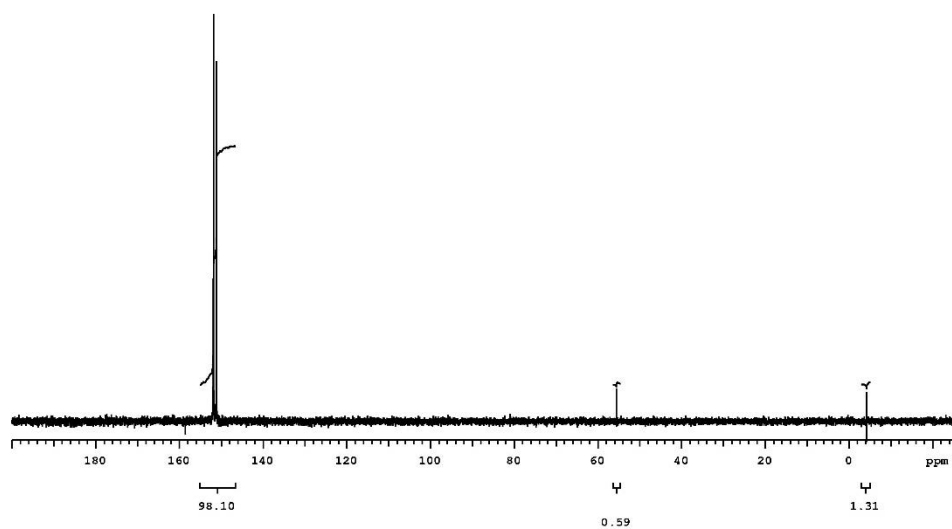

Fig. S5  $^{31}\text{P}$ -NMR spectra of compound **4** in  $\text{CDCl}_3$ .

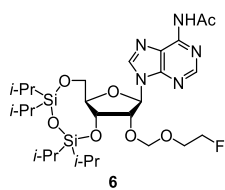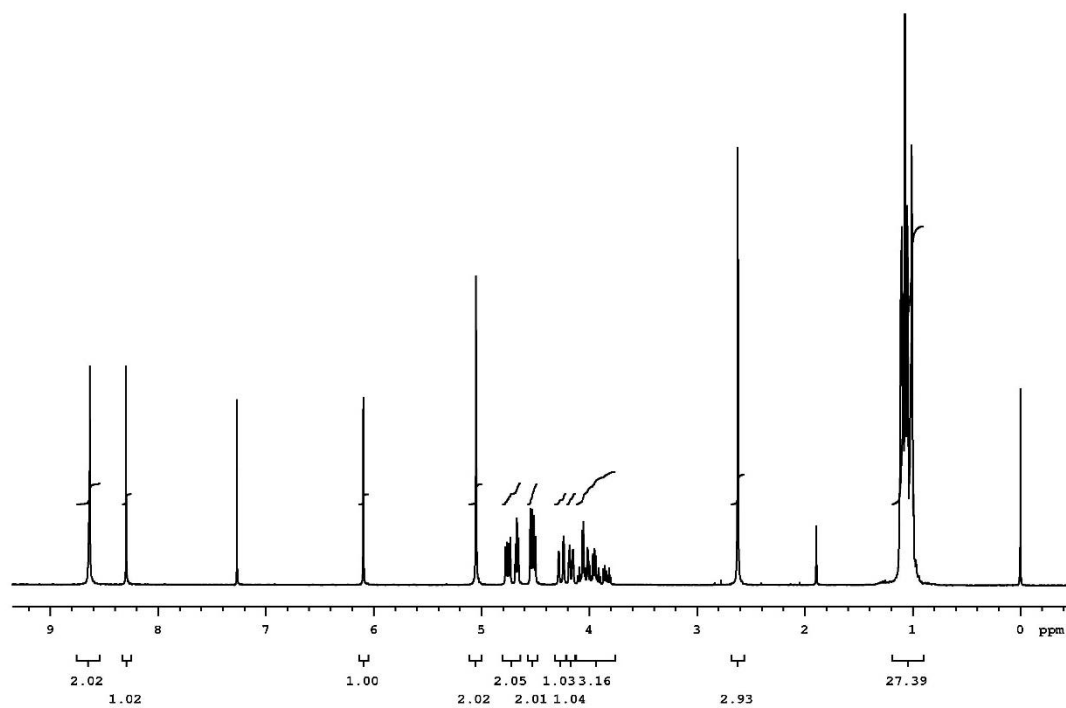

Fig. S6  $^1\text{H-NMR}$  spectra of compound **6** in  $\text{CDCl}_3$ .

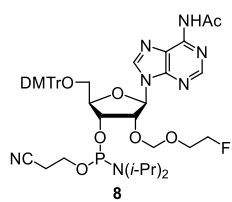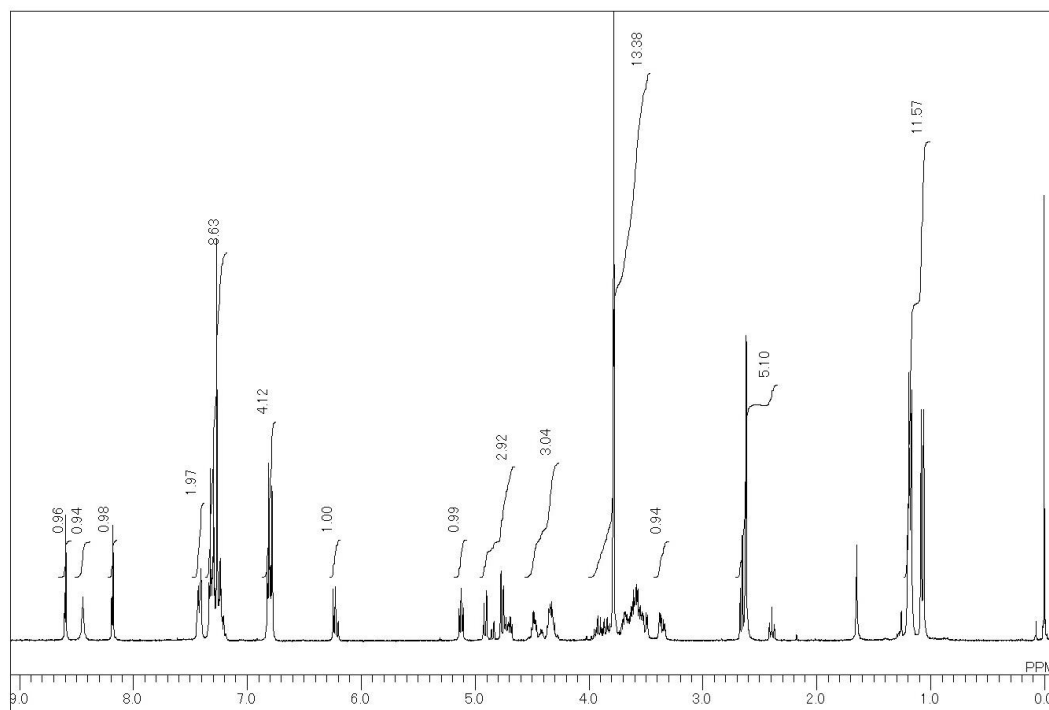

Fig. S7  $^1\text{H-NMR}$  spectra of compound **8** in  $\text{CDCl}_3$ .

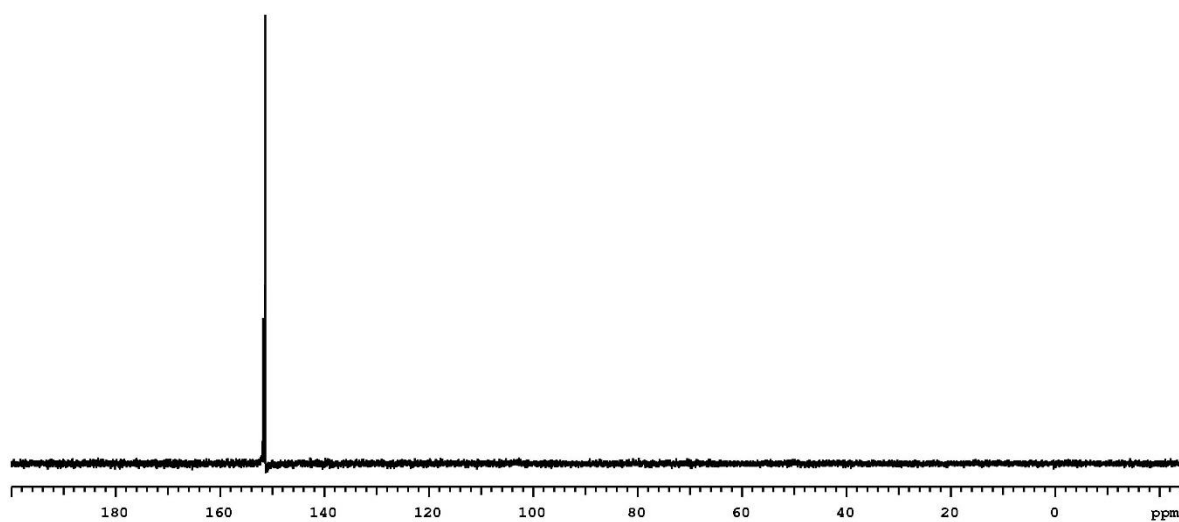

Fig. S8  $^{31}\text{P-NMR}$  spectra of compound **8** in  $\text{CDCl}_3$ .

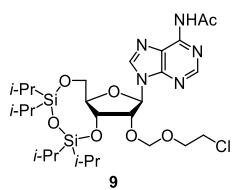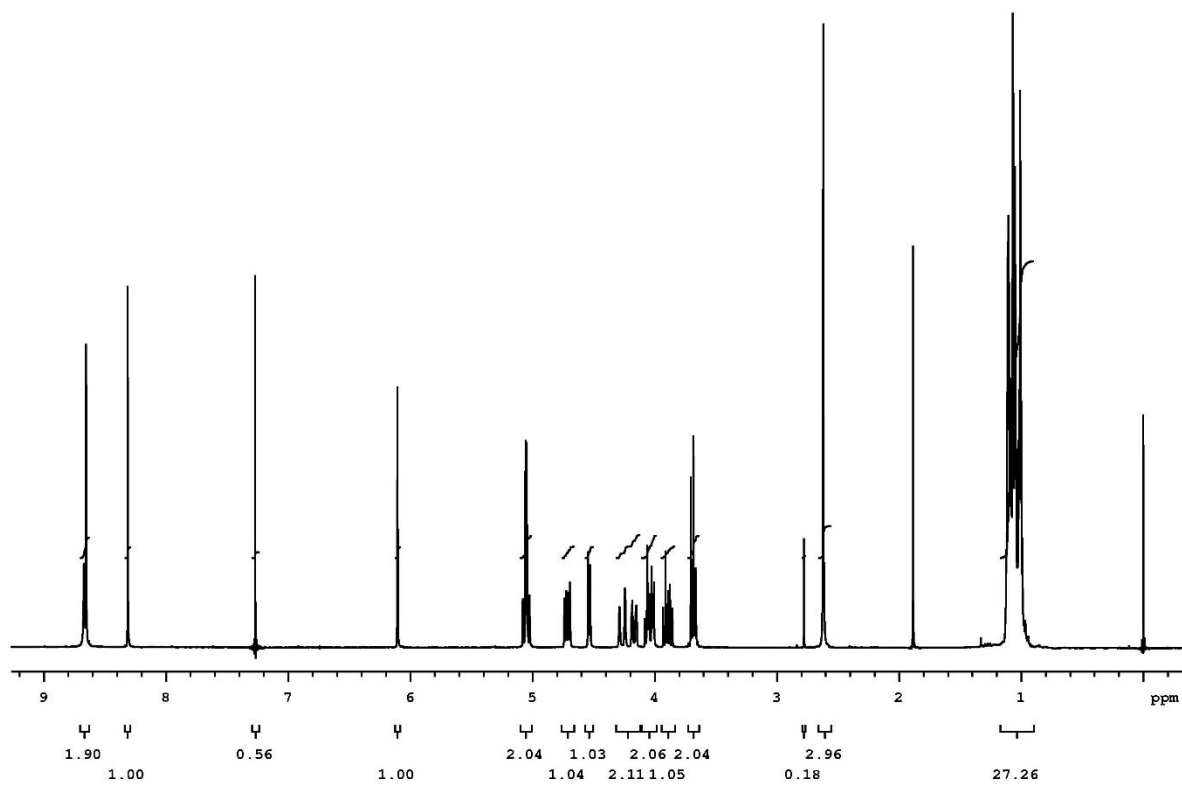

Fig. S9  $^1\text{H-NMR}$  spectra of compound **9** in  $\text{CDCl}_3$ .



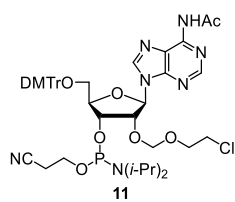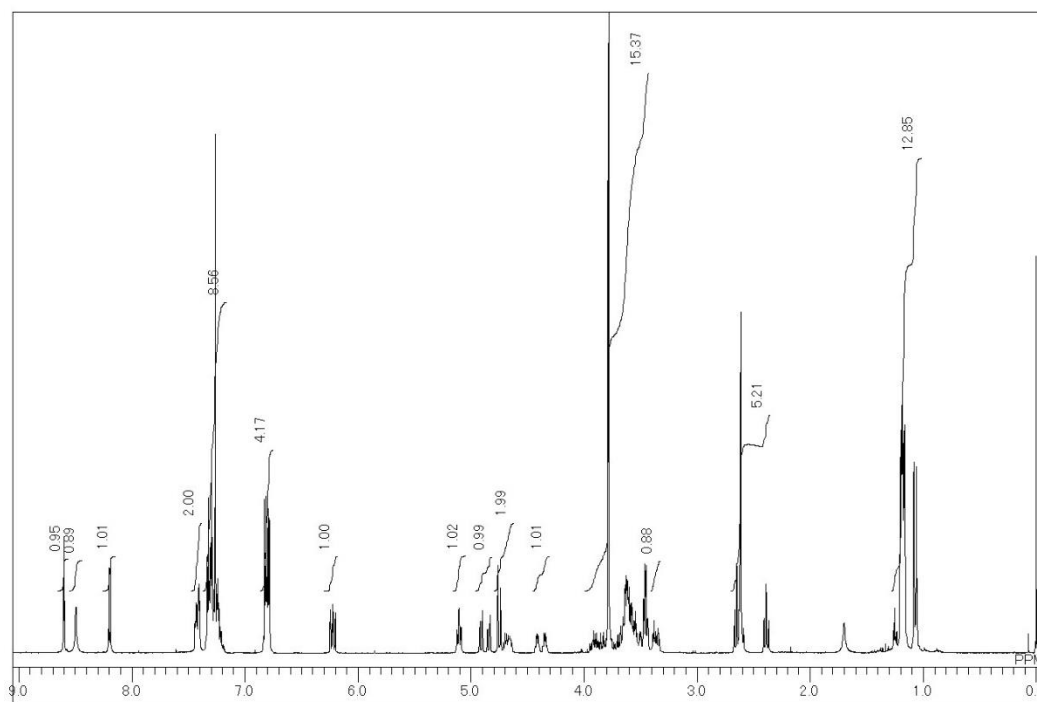

Fig. S10  $^1\text{H}$ -NMR spectra of compound **11** in  $\text{CDCl}_3$ .

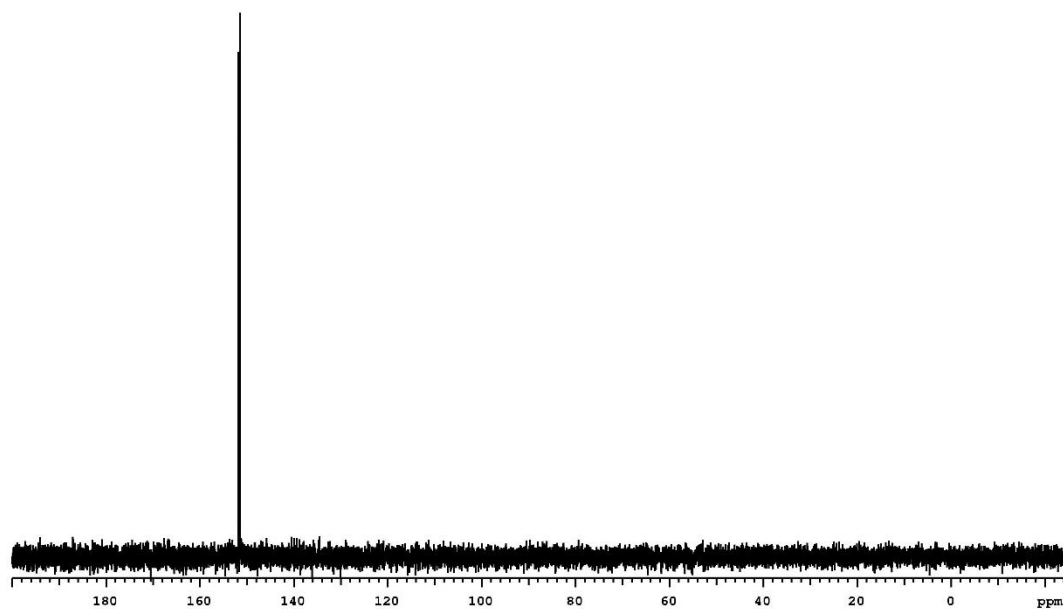

Fig. S11  $^{31}\text{P}$ -NMR spectra of compound **11** in  $\text{CDCl}_3$ .

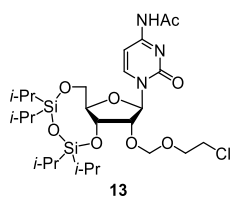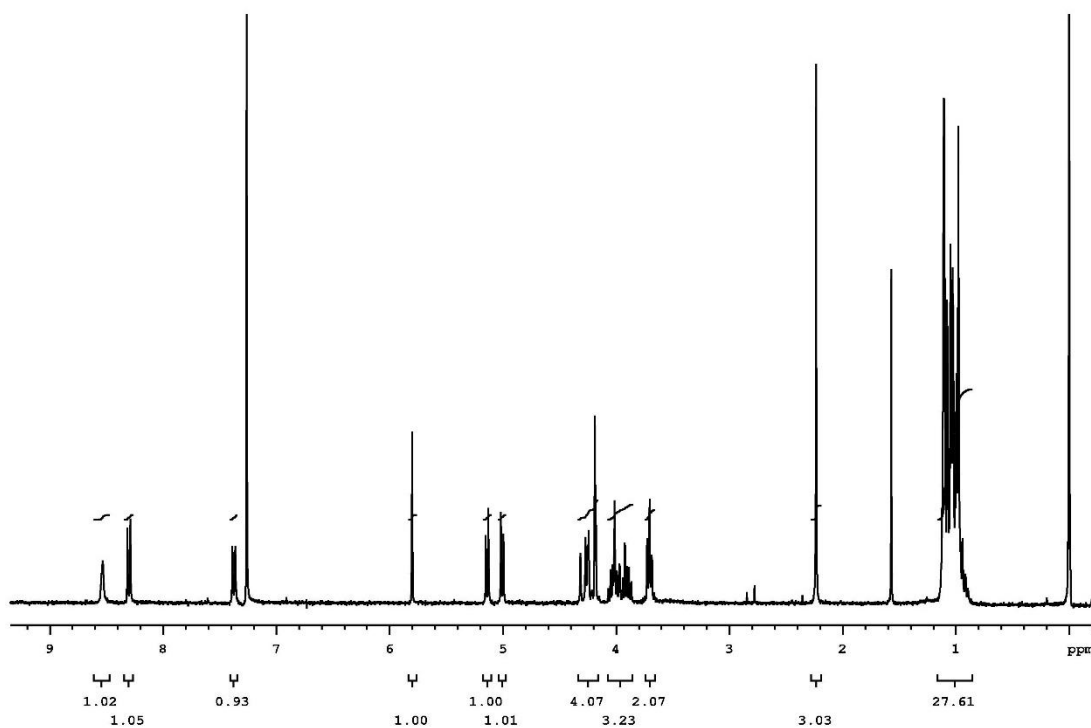

Fig. S12 <sup>1</sup>H-NMR spectra of compound 13 in CDCl<sub>3</sub>.

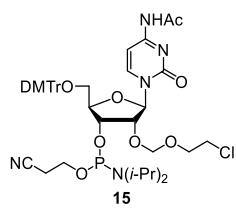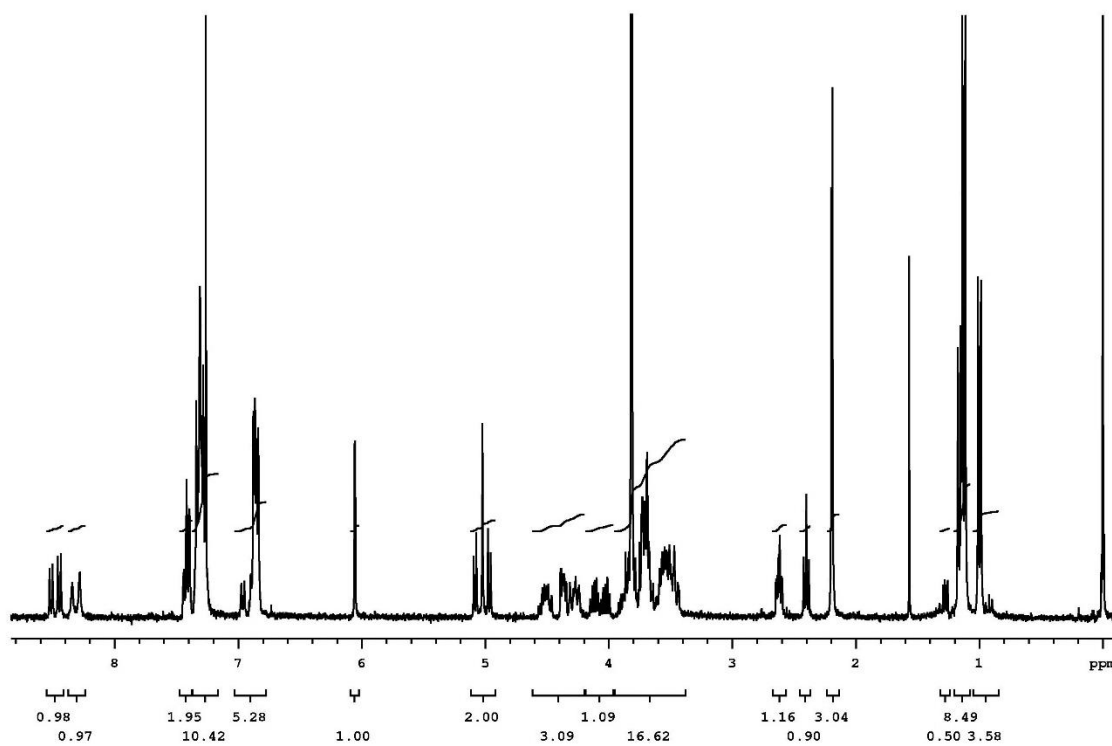

Fig. S13  $^1\text{H}$ -NMR spectra of compound **15** in  $\text{CDCl}_3$ .

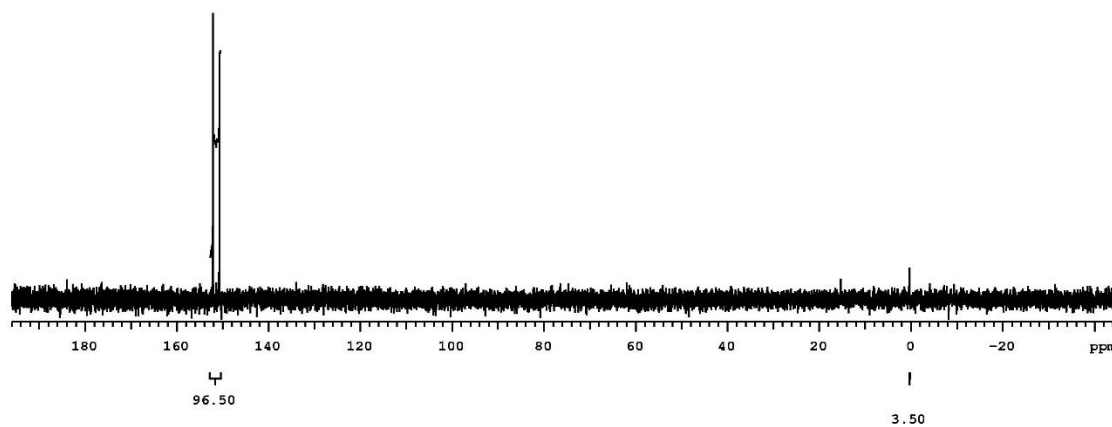

Fig. S14  $^{31}\text{P}$ -NMR spectra of compound **15** in  $\text{CDCl}_3$ .

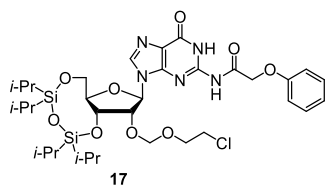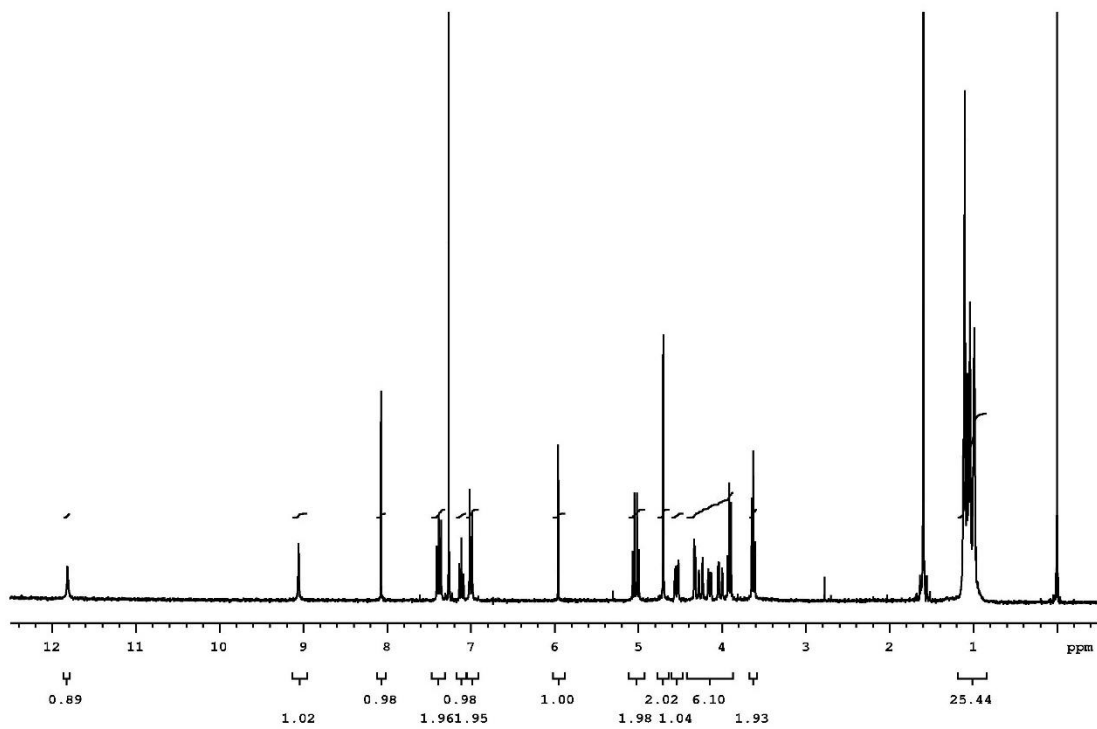

Fig. S15  $^1\text{H-NMR}$  spectra of compound 17 in  $\text{CDCl}_3$ .

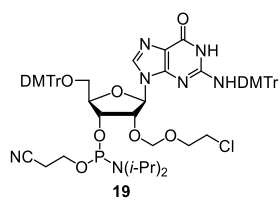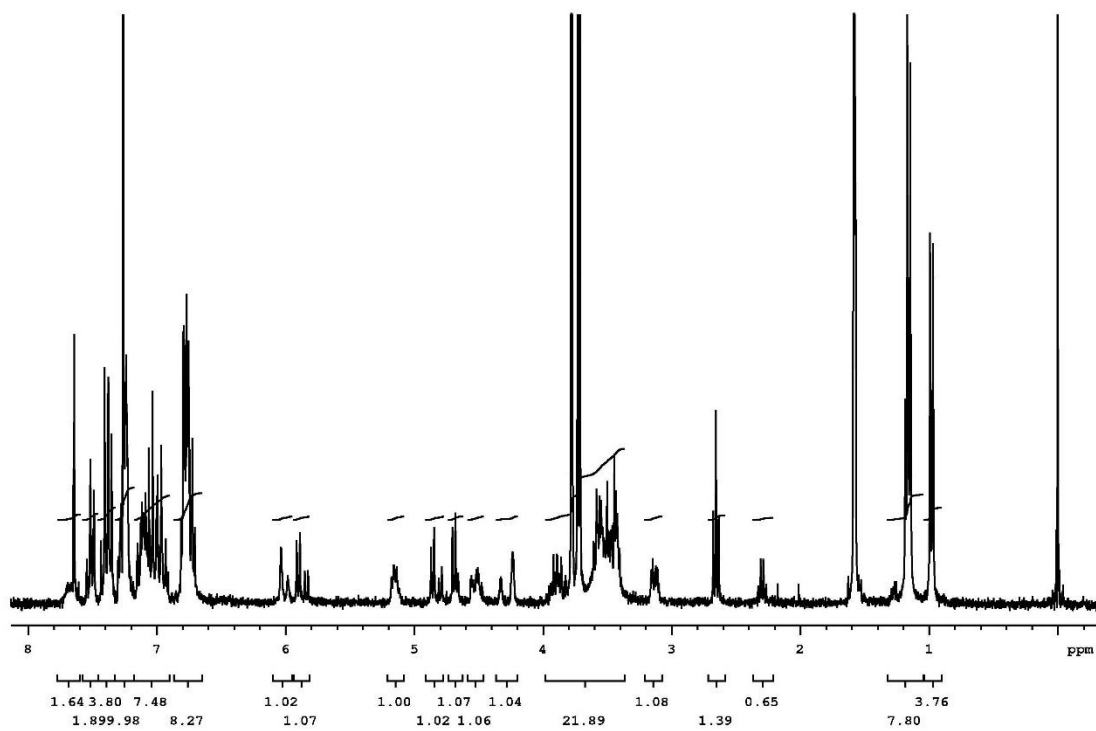

Fig. S18 <sup>1</sup>H-NMR spectra of compound **19** in CDCl<sub>3</sub>.

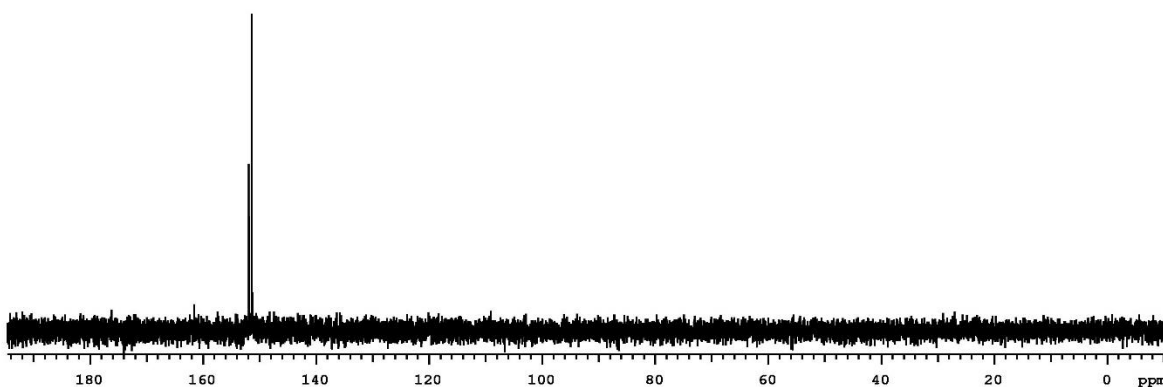

Fig. S20 <sup>31</sup>P-NMR spectra of compound **19** in CDCl<sub>3</sub>.
